# Supplementary material for: Structural and photophysical characterization of mono- and binuclear Cu(i) complexes based on carbohydrazones: a combined experimental and computational study
Source: Royal Society of Chemistry journal article supplement (doi:10.1039/c5ce02208h), 2016-01-01
Supplement: c5ce02208h1.pdf [file c5ce02208h1.pdf]

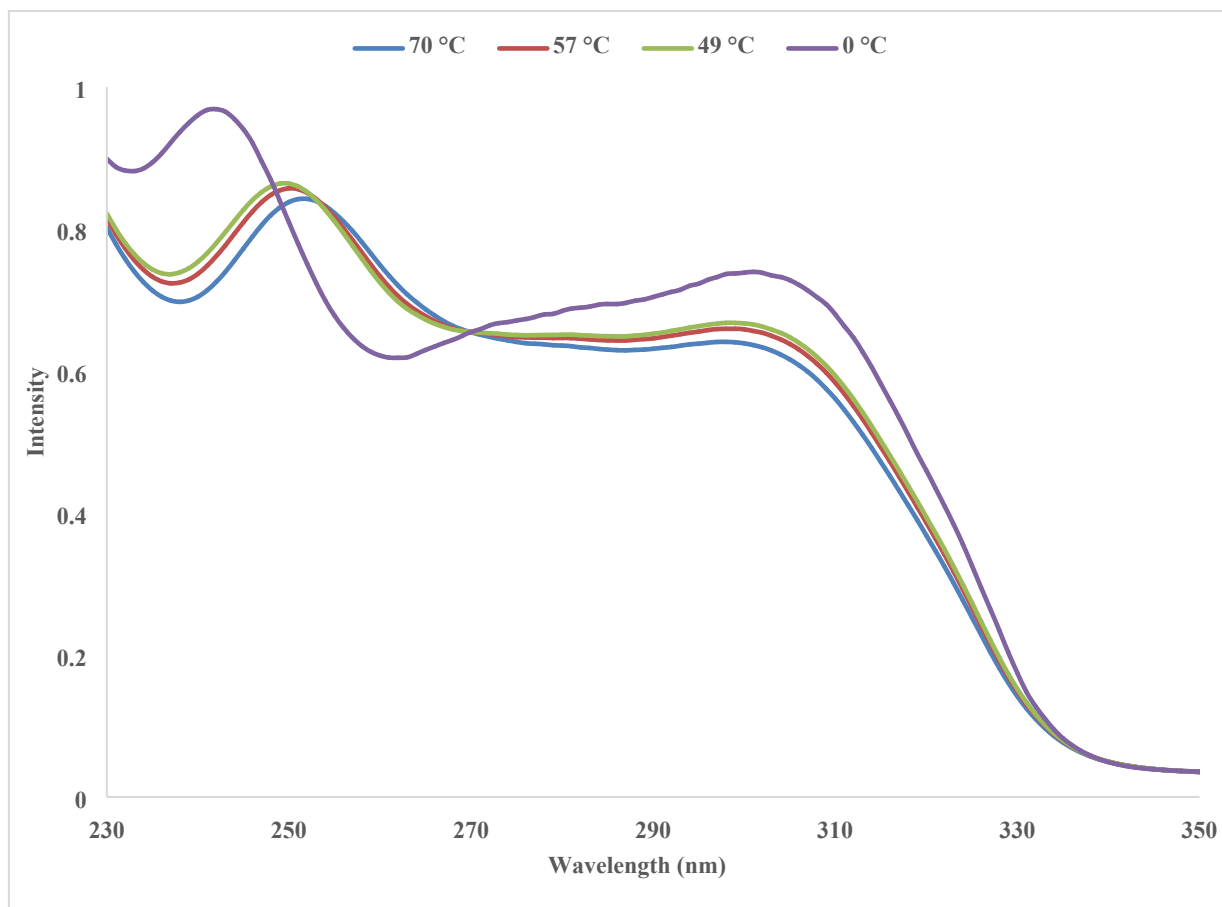

**Figure S1.** Absorption spectra of  $C_{p3}$  in acetonitrile solution at different temperatures

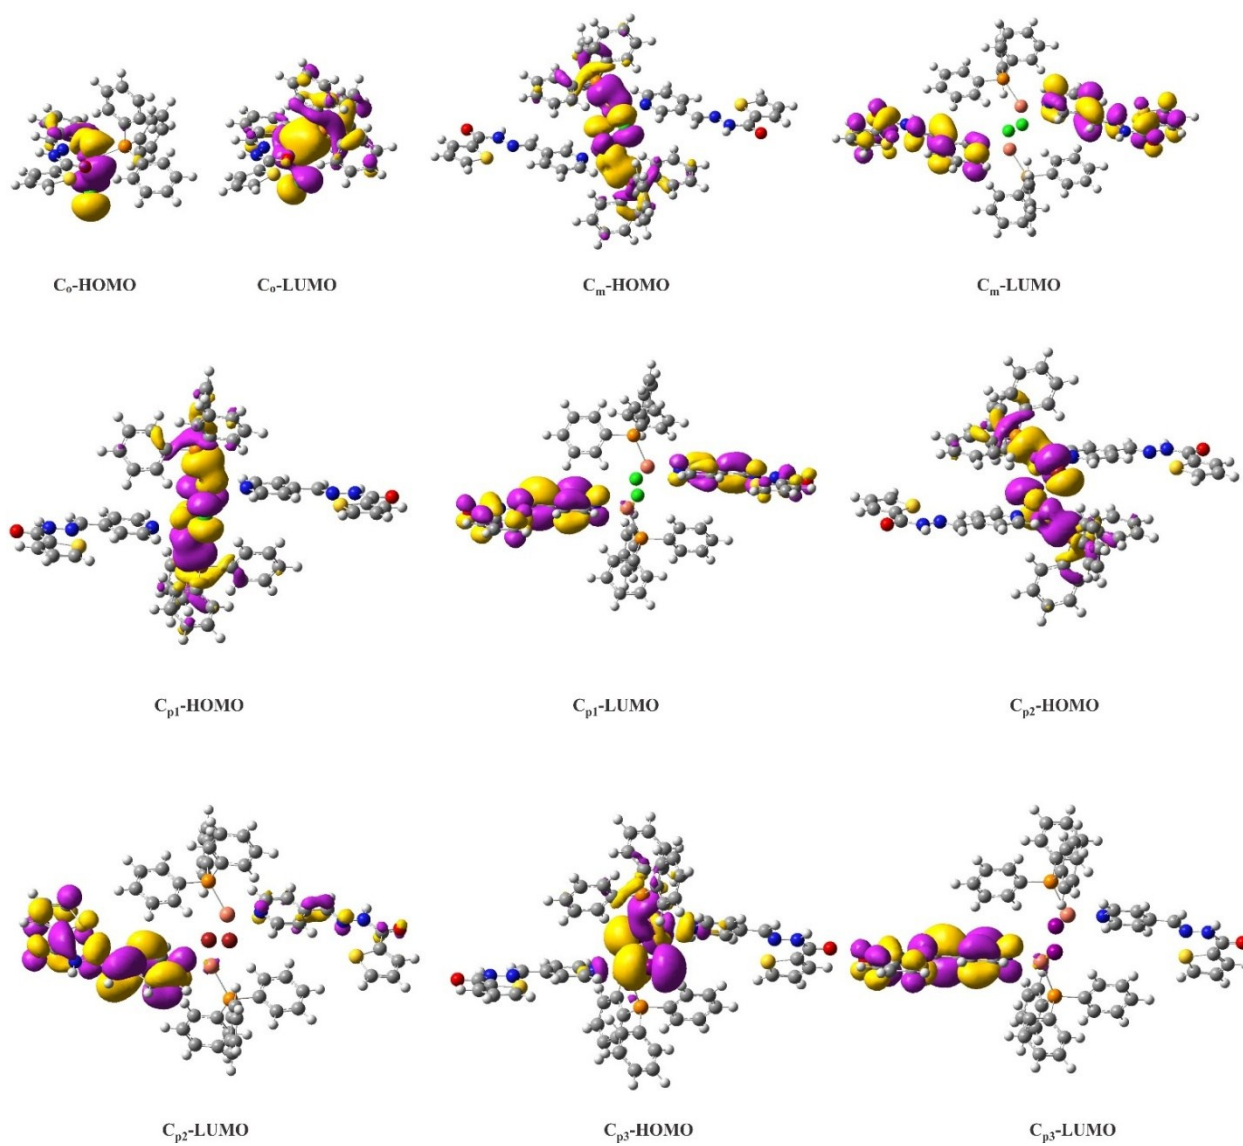

**Figure S2.** HOMO and LUMO orbitals of complexes in  $\text{CH}_2\text{Cl}_2$

Co

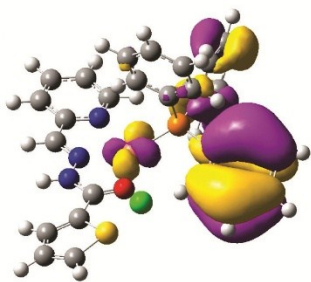

HOMO-6

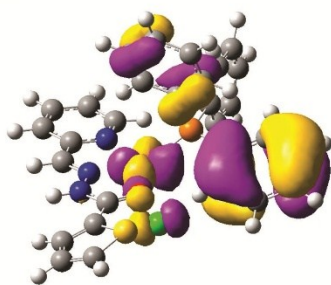

HOMO-5

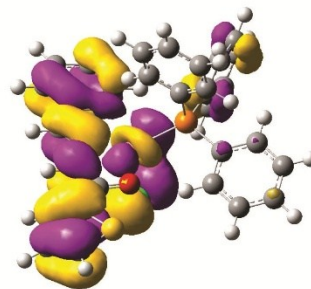

HOMO-4

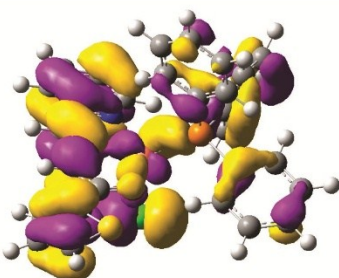

HOMO-3

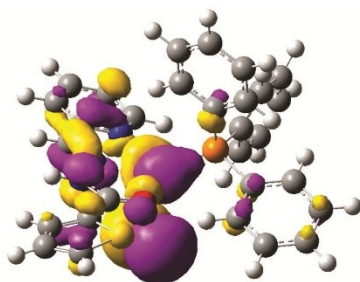

HOMO-2

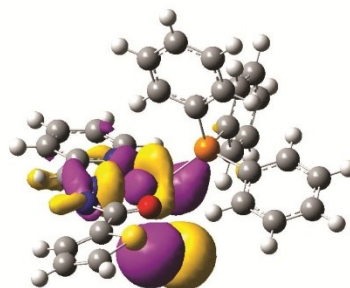

HOMO-1

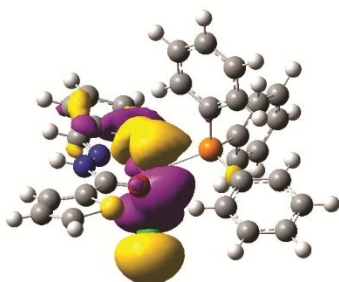

HOMO

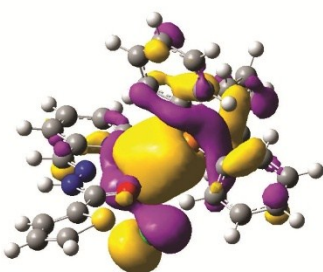

LUMO

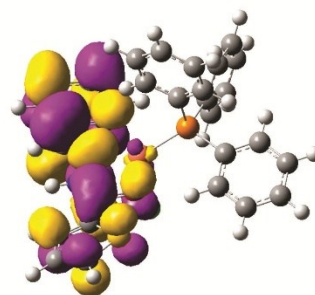

LUMO+1

**C<sub>m</sub>**

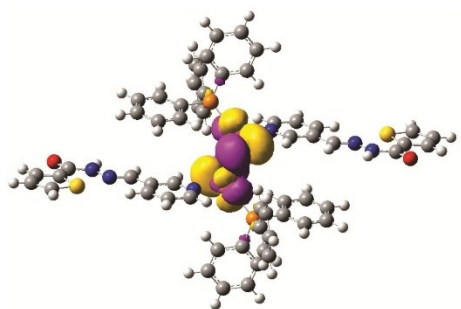

**HOMO-8**

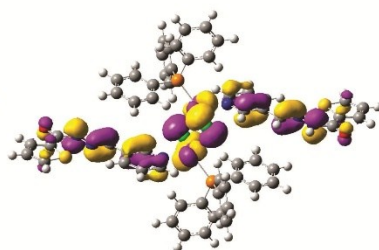

**HOMO-7**

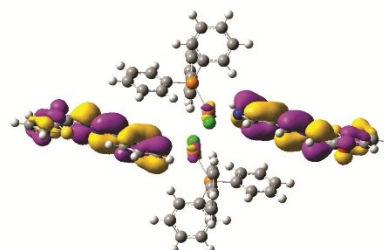

**HOMO-6**

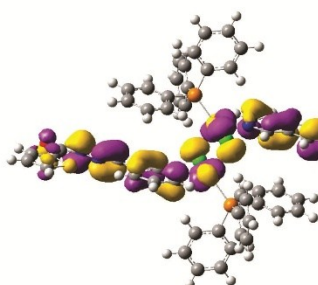

**HOMO-5**

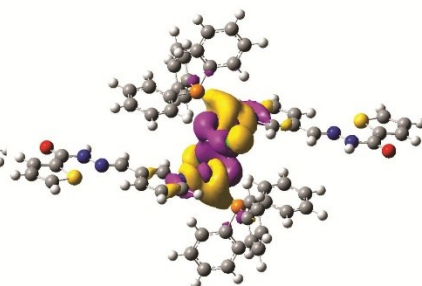

**HOMO-4**

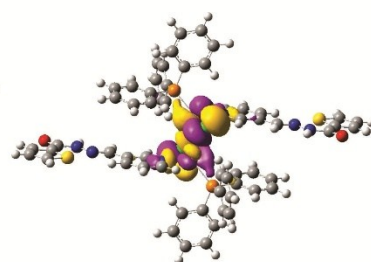

**HOMO-3**

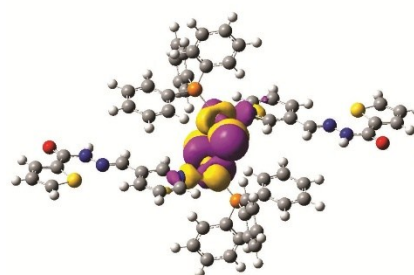

**HOMO-2**

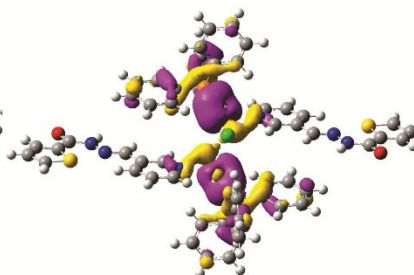

**HOMO-1**

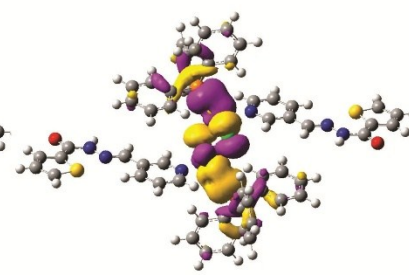

**HOMO**

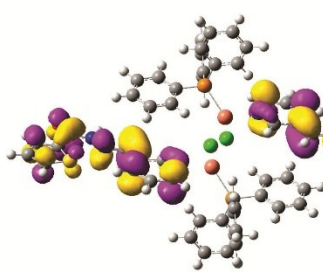

**LUMO**

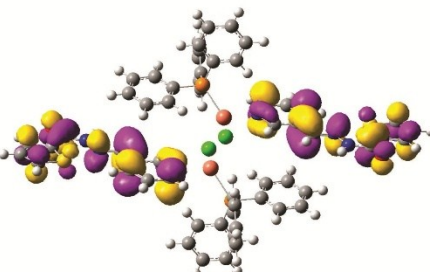

**LUMO+1**

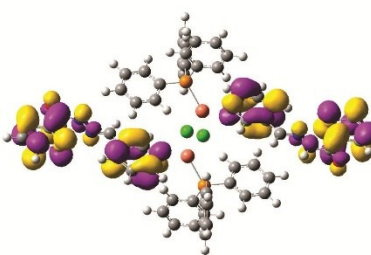

**LUMO+2**

# Cp1

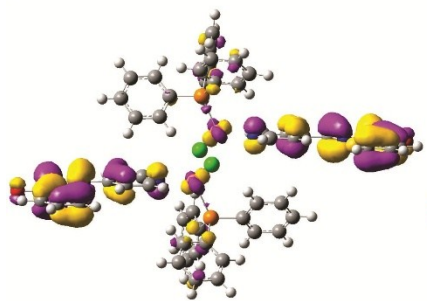

HOMO-8

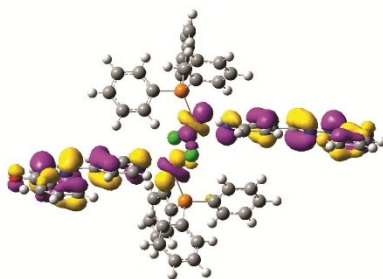

HOMO-7

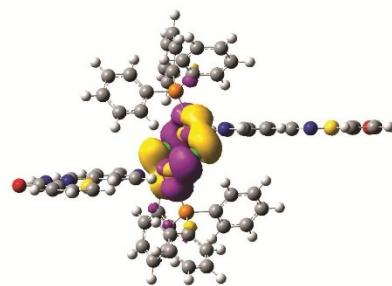

HOMO-6

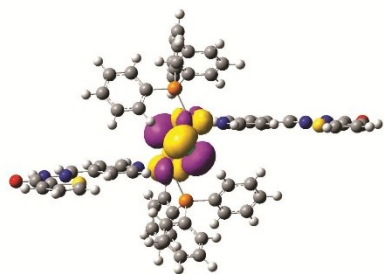

HOMO-5

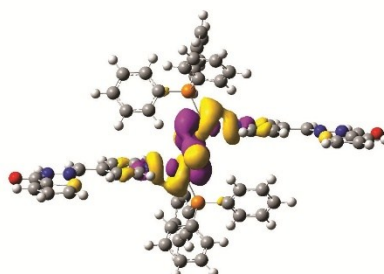

HOMO-4

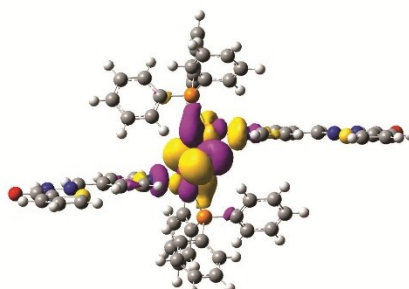

HOMO-3

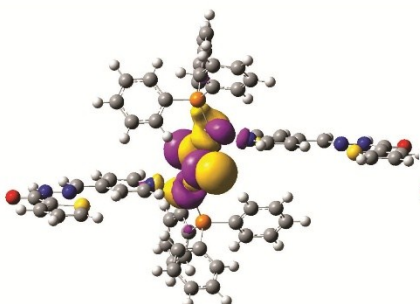

HOMO-2

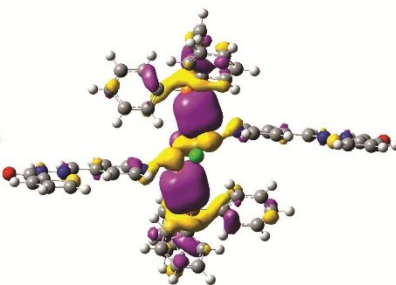

HOMO-1

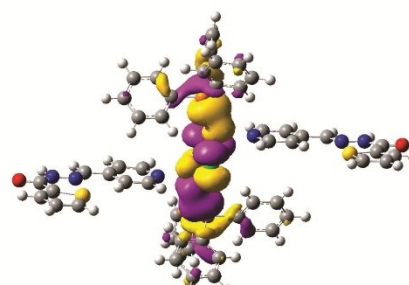

HOMO

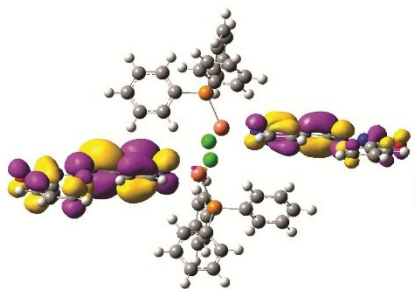

LUMO

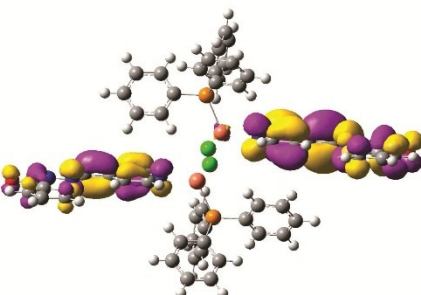

LUMO+1

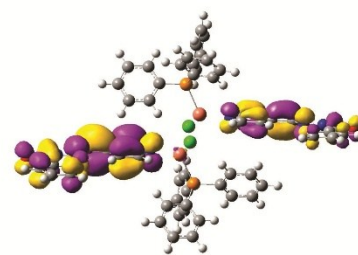

LUMO+2

# Cp2

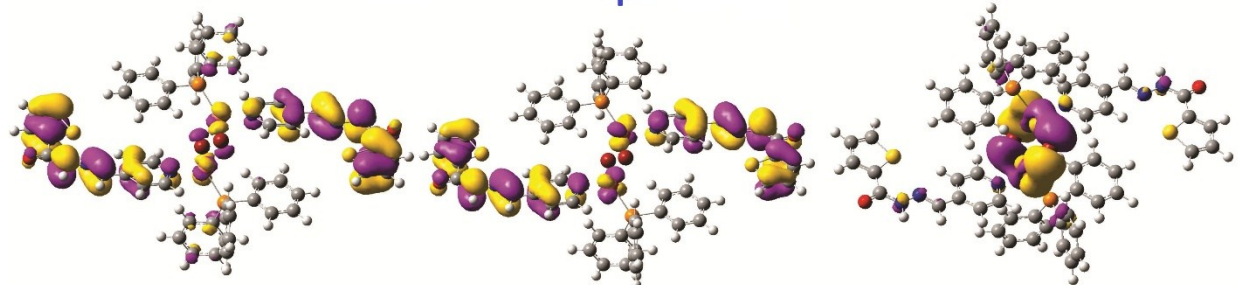

HOMO-8

HOMO-7

HOMO-6

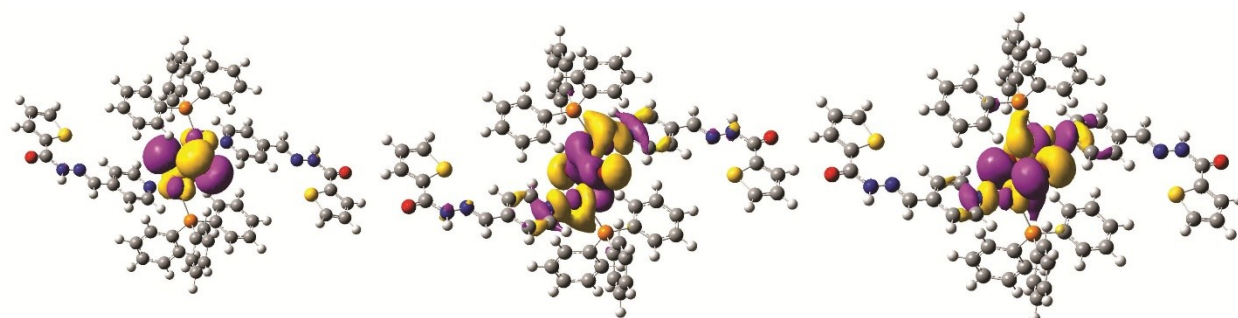

HOMO-5

HOMO-4

HOMO-3

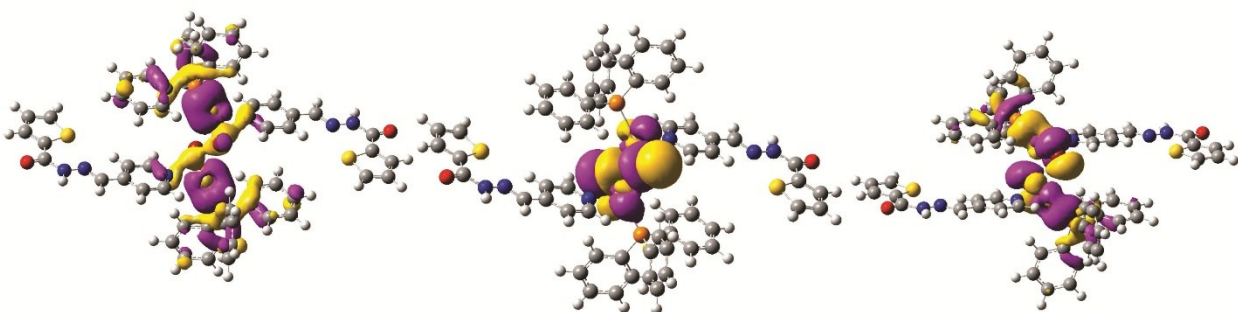

HOMO-2

HOMO-1

HOMO

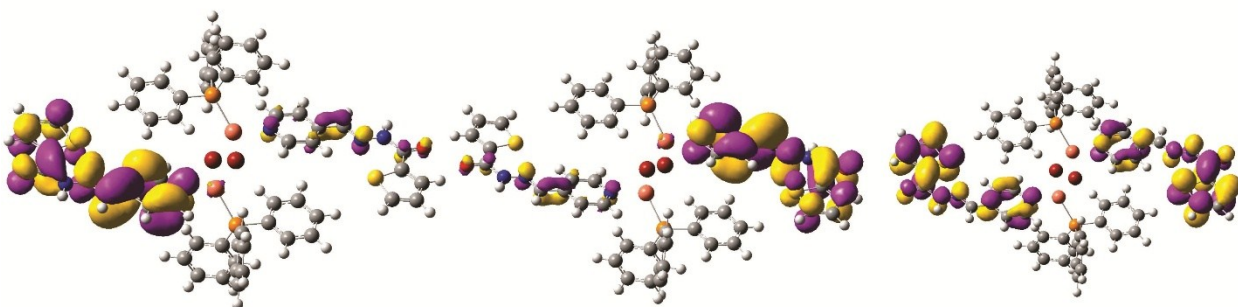

LUMO

LUMO+1

LUMO+2

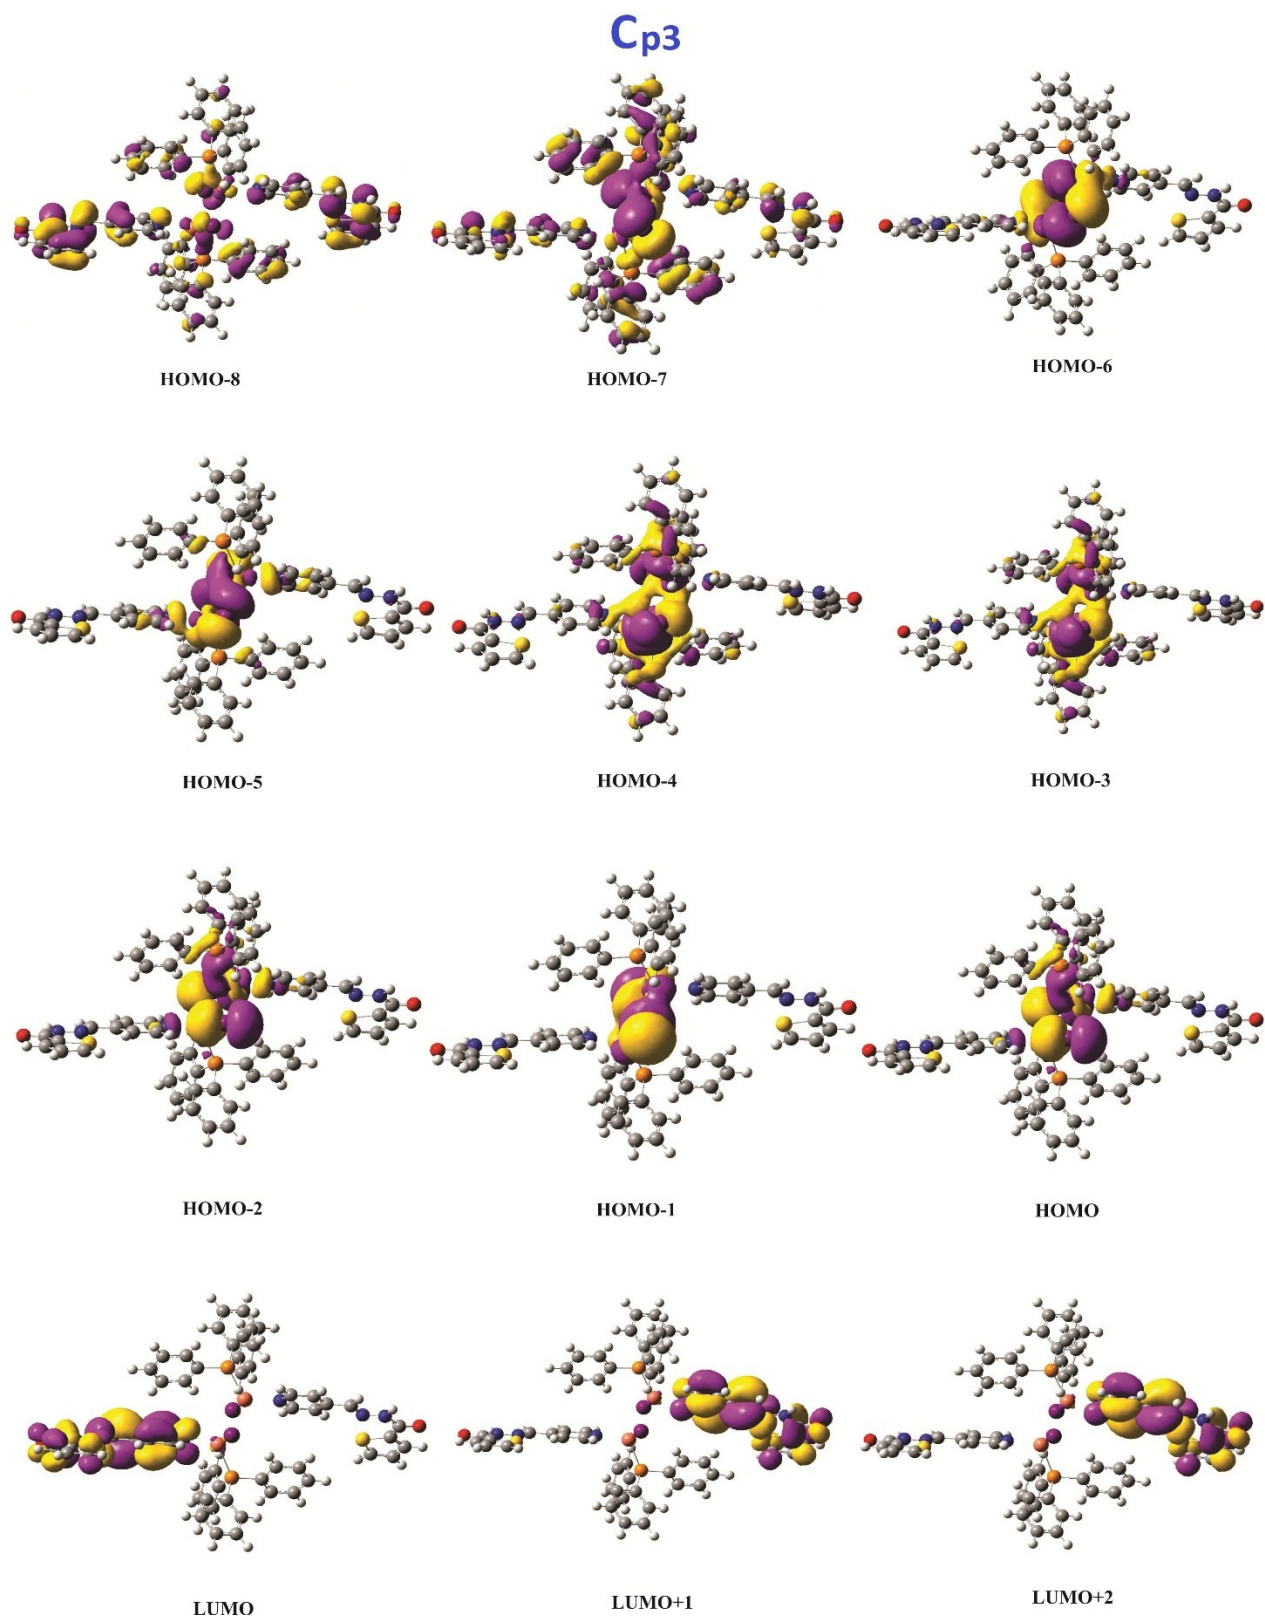

**Figure S3.** Frontier orbitals of compounds in  $\text{CH}_2\text{Cl}_2$

$C_0$

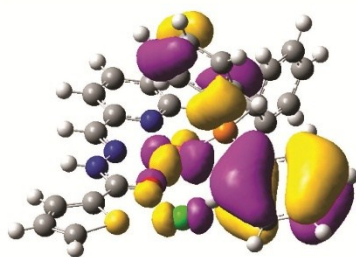

HOMO-6

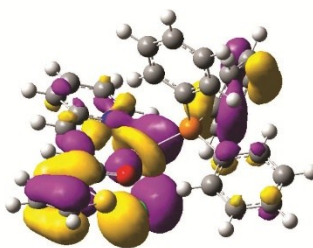

HOMO-5

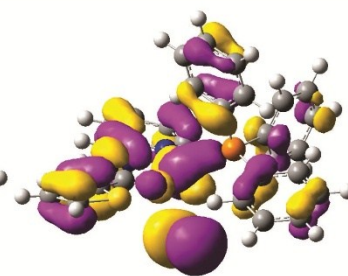

HOMO-4

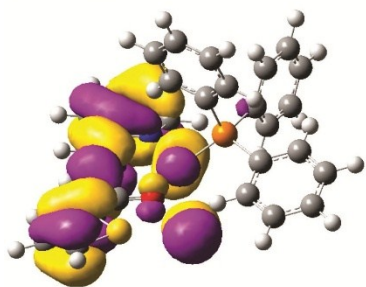

HOMO-3

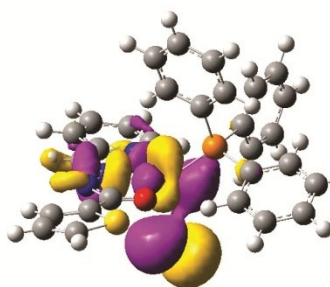

HOMO-2

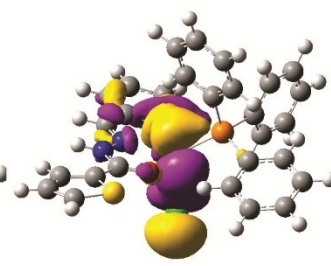

HOMO-1

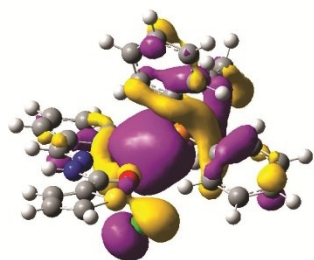

HOMO

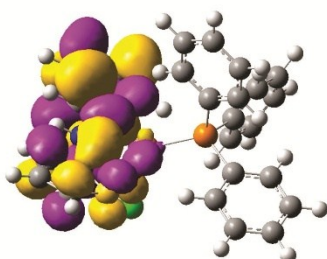

LUMO

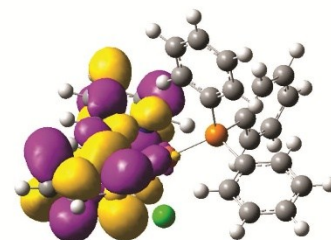

LUMO+1



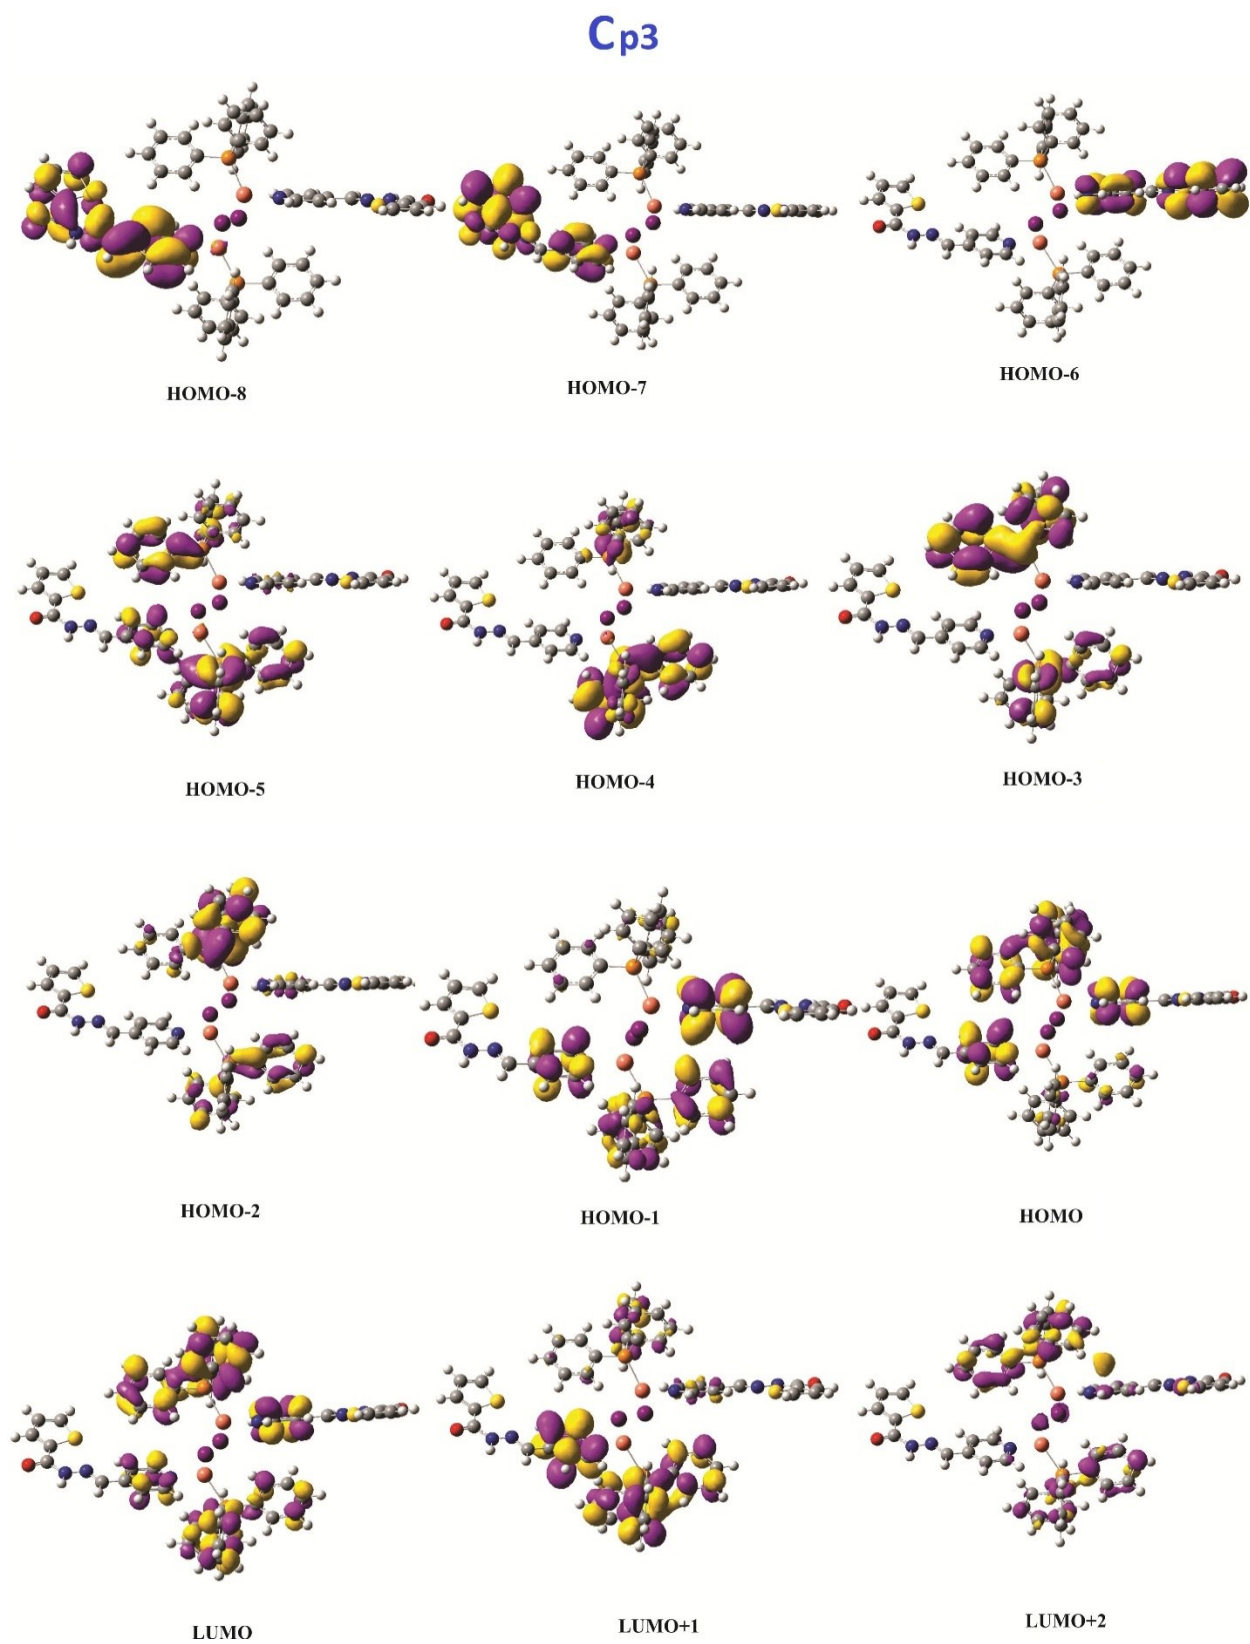

**Figure S4.** Frontier orbitals of C<sub>0</sub> and C<sub>p3</sub> in CH<sub>3</sub>CN

**Table S1. Crystallographic data of compounds**

| Compound                     | <b>C<sub>o</sub></b>                                               | <b>C<sub>m</sub></b>                                                                                                        | <b>C<sub>p1</sub></b>                                                                                                       | <b>C<sub>p2</sub></b>                                                                                                       | <b>C<sub>p3</sub></b>                                                                                                      |
|------------------------------|--------------------------------------------------------------------|-----------------------------------------------------------------------------------------------------------------------------|-----------------------------------------------------------------------------------------------------------------------------|-----------------------------------------------------------------------------------------------------------------------------|----------------------------------------------------------------------------------------------------------------------------|
| Empirical formula            | C <sub>29</sub> H <sub>24</sub> ClCuN <sub>3</sub> OPS             | C <sub>58</sub> H <sub>48</sub> Cl <sub>2</sub> Cu <sub>2</sub> N <sub>6</sub> O <sub>2</sub> P <sub>2</sub> S <sub>2</sub> | C <sub>58</sub> H <sub>48</sub> Cl <sub>2</sub> Cu <sub>2</sub> N <sub>6</sub> O <sub>2</sub> P <sub>2</sub> S <sub>2</sub> | C <sub>62</sub> H <sub>54</sub> Br <sub>2</sub> Cu <sub>2</sub> N <sub>8</sub> O <sub>2</sub> P <sub>2</sub> S <sub>2</sub> | C <sub>62</sub> H <sub>54</sub> Cu <sub>2</sub> I <sub>2</sub> N <sub>8</sub> O <sub>2</sub> P <sub>2</sub> S <sub>2</sub> |
| Formula weight               | 592.53                                                             | 1185.06                                                                                                                     | 1185.06                                                                                                                     | 1356.08                                                                                                                     | 1450.06                                                                                                                    |
| Wavelength (Å)               | 1.54184                                                            | 1.54184                                                                                                                     | 0.71073                                                                                                                     | 1.54184                                                                                                                     | 1.54184                                                                                                                    |
| T [K]                        | 173                                                                | 173                                                                                                                         | 173                                                                                                                         | 173                                                                                                                         | 173                                                                                                                        |
| Crystal system               | monoclinic                                                         | triclinic                                                                                                                   | monoclinic                                                                                                                  | Triclinic                                                                                                                   | Triclinic                                                                                                                  |
| Space group                  | <i>P</i> 1 21/ <i>c</i> 1                                          | <i>ρ</i> $\bar{1}$                                                                                                          | <i>C</i> 1 2/ <i>c</i> 1                                                                                                    | <i>ρ</i> $\bar{1}$                                                                                                          | <i>ρ</i> $\bar{1}$                                                                                                         |
| <i>a</i> [Å]                 | 14.8620(3)                                                         | 8.6008(2)                                                                                                                   | 21.3680(11)                                                                                                                 | 8.5296(9)                                                                                                                   | 8.6337(6)                                                                                                                  |
| <i>b</i> [Å]                 | 9.93191(19)                                                        | 11.9216(4)                                                                                                                  | 14.5156(9)                                                                                                                  | 13.6245(18)                                                                                                                 | 13.7145(10)                                                                                                                |
| <i>c</i> [Å]                 | 18.7016(4)                                                         | 13.5031(4)                                                                                                                  | 18.5708(9)                                                                                                                  | 14.4843(17)                                                                                                                 | 14.4014(12)                                                                                                                |
| $\alpha$ [°]                 | 90                                                                 | 98.280(3)                                                                                                                   | 90                                                                                                                          | 69.313(11)                                                                                                                  | 70.112(7)                                                                                                                  |
| $\beta$ [°]                  | 99.793(2)                                                          | 90.093(2)                                                                                                                   | 105.412(5)                                                                                                                  | 83.252(9)                                                                                                                   | 83.697(6)                                                                                                                  |
| $\gamma$ [°]                 | 90                                                                 | 94.468(2)                                                                                                                   | 90                                                                                                                          | 72.076(10)                                                                                                                  | 71.990(6)                                                                                                                  |
| <i>V</i> [Å <sup>3</sup> ]   | 2720.30(10)                                                        | 1365.83(7)                                                                                                                  | 5553.0(5)                                                                                                                   | 1498.2(3)                                                                                                                   | 1524.9(2)                                                                                                                  |
| <i>Z</i>                     | 4                                                                  | 1                                                                                                                           | 4                                                                                                                           | 1                                                                                                                           | 1                                                                                                                          |
| Density [g/cm <sup>3</sup> ] | 1.447                                                              | 1.441                                                                                                                       | 1.418                                                                                                                       | 1.503                                                                                                                       | 1.540                                                                                                                      |
| $\mu$ [mm <sup>-1</sup> ]    | 3.530                                                              | 3.515                                                                                                                       | 1.043                                                                                                                       | 3.994                                                                                                                       | 10.338                                                                                                                     |
| F(000)                       | 1216.0                                                             | 608.0                                                                                                                       | 2432.0                                                                                                                      | 688                                                                                                                         | 724.0                                                                                                                      |
| $\theta$ [°]                 | 4.7690 to 71.0550                                                  | 4.6310 to 71.3310                                                                                                           | 4.0390 to 29.557                                                                                                            | 3.9530 to 71.113                                                                                                            | 3.9740 to 71.176                                                                                                           |
| Crystal Size [mm]            | 0.03x 0.1 x 0.15                                                   | 0.05x 0.2 x 0.4                                                                                                             | 0.6 x 1.0 x 1.0                                                                                                             | 0.02 x 0.02 x 0.1                                                                                                           | 0.04 x 0.1 x 0.25                                                                                                          |
| Index ranges                 | -9<= <i>h</i> <=17,<br>-11<= <i>k</i> <=12,<br>-22<= <i>l</i> <=22 | -10<= <i>h</i> <=10,<br>-14<= <i>k</i> <=14,<br>-16<= <i>l</i> <=15                                                         | -29<= <i>h</i> <=27,<br>-18<= <i>k</i> <=18,<br>-25<= <i>l</i> <=15                                                         | -10<= <i>h</i> <=10,<br>-16<= <i>k</i> <=10,<br>-17<= <i>l</i> <=15                                                         | -10<= <i>h</i> <=6,<br>-16<= <i>k</i> <=15,<br>-16<= <i>l</i> <=17                                                         |
| Reflections collected        | 15337                                                              | 20121                                                                                                                       | 18779                                                                                                                       | 8033                                                                                                                        | 8367                                                                                                                       |
| <i>R</i> <sub>int</sub> [%]  | 0.0619                                                             | 0.0300                                                                                                                      | 0.0353                                                                                                                      | 0.0554                                                                                                                      | 0.0404                                                                                                                     |
| Absorption correction        | Semi-empirical from equivalents                                    | Semi-empirical from equivalents                                                                                             | Semi-empirical from equivalents                                                                                             | Semi-empirical from equivalents                                                                                             | Semi-empirical from equivalents                                                                                            |

| Refinement method                           | Full-matrix least-squares on F <sup>2</sup> |
|---------------------------------------------|---------------------------------------------|---------------------------------------------|---------------------------------------------|---------------------------------------------|---------------------------------------------|
| Independent reflections                     | 4983 [R(int) = 0.0619]                      | 5261 [R(int) = 0.0300]                      | 6619 [R(int) = 0.0353]                      | 5535 [R(int) = 0.0554]                      | 5662 [R(int) = 0.0295]                      |
| Max. and min. transmission                  | 1.00000 and 0.57263                         | 1.00000 and 0.60537                         | 1.00000 and 0.63853                         | 1.00000 and 0.84614                         | 1.00000 and 0.43725                         |
| Data / restraints / parameters              | 4983 / 0 / 334                              | 5261 / 0 / 334                              | 6619 / 303 / 335                            | 5535 / 0 / 362                              | 5662 / 0 / 362                              |
| Goodness-of-fit on F <sup>2</sup>           | 1.142                                       | 1.045                                       | 1.116                                       | 1.088                                       | 0.998                                       |
| Final R indices [I > 2σ(I)]                 | R1 = 0.0378, wR2 = 0.0852                   | R1 = 0.0279, wR2 = 0.0731                   | R1 = 0.0550, wR2 = 0.1699                   | R1 = 0.0653, wR2 = 0.1665                   | R1 = 0.0427, wR2 = 0.1074                   |
| R indices (all data)                        | R1 = 0.0669, wR2 = 0.1325                   | R1 = 0.0320, wR2 = 0.0758                   | R1 = 0.0750, wR2 = 0.1829                   | R1 = 0.0994, wR2 = 0.1845                   | R1 = 0.0517, wR2 = 0.1140                   |
| Largest diff. peak/hole [e/Å <sup>3</sup> ] | 0.505 and -0.513                            | 0.328 and -0.341                            | 1.263 and -1.176                            | 1.142 and -0.676                            | 1.288 and -0.940                            |

**Table S2. Calculated transition wavelength, oscillator strength (f) and main orbital contributions to the electronic absorption transitions for C<sub>0</sub>, C<sub>m</sub>, C<sub>p1</sub>, C<sub>p2</sub> and C<sub>p3</sub> complexes in CH<sub>2</sub>Cl<sub>2</sub>**

| Complex        | state | λ <sub>cal</sub> (nm) | f      | assignment                                                                                 |
|----------------|-------|-----------------------|--------|--------------------------------------------------------------------------------------------|
| C <sub>0</sub> | S1    | 395.93                | 0.0138 | HOMO → LUMO (57%)<br>HOMO-1 → LUMO (22%)                                                   |
|                | S2    | 361.23                | 0.0317 | HOMO → LUMO (31%)<br>HOMO-1 → LUMO (30%)<br>HOMO-2 → LUMO (25%)                            |
|                | S3    | 345.87                | 0.0362 | HOMO-2 → LUMO (51%)<br>HOMO-1 → LUMO (37%)                                                 |
|                | S4    | 317.61                | 0.0316 | HOMO-3 → LUMO (77%)                                                                        |
|                | S5    | 306.47                | 0.0706 | HOMO-4 → LUMO (53%)<br>HOMO-6 → LUMO (14%)                                                 |
|                | S6    | 289.24                | 0.7094 | HOMO-5 → LUMO (53%)<br>HOMO-4 → LUMO (14%)                                                 |
| C <sub>m</sub> | S1    | 298.89                | 0.0001 | HOMO → LUMO (24%)<br>HOMO-1 → LUMO+2 (21%)<br>HOMO-2 → LUMO (10%)<br>HOMO-3 → LUMO (10%)   |
|                | S2    | 298.71                | 0.0180 | HOMO → LUMO+1 (22%)<br>HOMO-1 → LUMO (22%)<br>HOMO-3 → LUMO+1 (11%)<br>HOMO-2 → LUMO (10%) |
|                | S3    | 291.95                | 0.0000 | HOMO → LUMO (43%)                                                                          |

|          |    |        |        |                                                                      |
|----------|----|--------|--------|----------------------------------------------------------------------|
|          |    |        |        | HOMO-4 →LUMO (12%)<br>HOMO-3 →LUMO (22%)                             |
|          | S4 | 291.61 | 0.1567 | HOMO →LUMO+1 (41%)<br>HOMO-4→LUMO+1 (11%)                            |
|          | S5 | 290.25 | 1.4906 | HOMO-6 →LUMO+1 (38%)<br>HOMO-5→LUMO (24%)<br>HOMO-7→LUMO (16%)       |
| $C_{p1}$ | S1 | 318.55 | 0.5406 | HOMO →LUMO (49%)<br>HOMO-1 →LUMO+1 (20%)                             |
|          | S2 | 317.98 | 0.0429 | HOMO →LUMO+1 (46%)<br>HOMO-1 →LUMO (24%)                             |
|          | S3 | 315.39 | 0.0094 | HOMO-3 →LUMO (26%)<br>HOMO-4 →LUMO (18%)                             |
|          | S4 | 314.49 | 0.0034 | HOMO-3 →LUMO+1 (30%)<br>HOMO-4 →LUMO+1 (20%)                         |
|          | S5 | 290.18 | 0.7640 | HOMO-7 →LUMO (25%)<br>HOMO-6 →LUMO+1 (25%)<br>HOMO →LUMO (12%)       |
|          | S6 | 288.97 | 0.3118 | HOMO-8 →LUMO (25%)<br>HOMO-7 →LUMO+1 (23%)                           |
| $C_{p2}$ | S1 | 316.83 | 0.1275 | HOMO →LUMO+1 (47%)<br>HOMO-2 →LUMO+1 (17%)                           |
|          | S2 | 316.67 | 0.1208 | HOMO →LUMO (46%)<br>HOMO-2 →LUMO (20%)                               |
|          | S3 | 310.47 | 0.0792 | HOMO-3 →LUMO (29%)<br>HOMO-4 →LUMO (19%)<br>HOMO →LUMO (16%)         |
|          | S4 | 310.18 | 0.0296 | HOMO-3 →LUMO+1 (30%)<br>HOMO-4 →LUMO+1 (19%)<br>HOMO →LUMO+1 (15%)   |
|          | S5 | 293.74 | 0.8984 | HOMO-1 →LUMO+1 (25%)<br>HOMO-7 →LUMO+1 (14%)<br>HOMO-8 →LUMO (10%)   |
| $C_{p3}$ | S1 | 323.31 | 0.1991 | HOMO →LUMO (74%)<br>HOMO-3 →LUMO (9%)                                |
|          | S2 | 319.14 | 0.1313 | HOMO →LUMO+1 (74%)<br>HOMO-3 →LUMO+1 (10%)                           |
|          | S3 | 310.78 | 0.0122 | HOMO-2 →LUMO (36%)<br>HOMO-3 →LUMO (18%)<br>HOMO-5 →LUMO (16%)       |
|          | S4 | 310.48 | 0.0042 | HOMO-2 →LUMO+1 (55%)<br>HOMO-5 →LUMO+1 (14%)                         |
|          | S5 | 298.63 | 0.3331 | HOMO-1 →LUMO+1 (61%)                                                 |
|          | S6 | 297.76 | 0.0413 | HOMO-1 →LUMO (79%)                                                   |
|          | S7 | 291.62 | 0.6358 | HOMO-8 →LUMO (27%)<br>HOMO-9 →LUMO (22%)                             |
|          | S8 | 287.71 | 0.3456 | HOMO-9 →LUMO+1 (28%)<br>HOMO-1 →LUMO+1 (20%)<br>HOMO-8 →LUMO+1 (16%) |

**Table S3.** Calculated transition wavelength, oscillator strength (f) and main orbital contributions to the electronic absorption transitions for C<sub>0</sub> and C<sub>p3</sub> complexes in CH<sub>3</sub>CN

| Complex         | state | $\lambda_{\text{cal}}$ (nm) | f      | assignment                                                     |
|-----------------|-------|-----------------------------|--------|----------------------------------------------------------------|
| C <sub>0</sub>  | S1    | 384.05                      | 0.0112 | HOMO →LUMO (69%)                                               |
|                 | S2    | 352.15                      | 0.0334 | HOMO →LUMO (68%)                                               |
|                 | S3    | 333.78                      | 0.0395 | HOMO-3 →LUMO (25%)<br>HOMO-2 →LUMO (24%)<br>HOMO-5 →LUMO (15%) |
|                 | S4    | 309.16                      | 0.0862 | HOMO-2 →LUMO+1 (44%)<br>HOMO-5 →LUMO+1 (13%)                   |
|                 | S5    | 301.19                      | 0.1361 | HOMO-4 →LUMO (34%)<br>HOMO-5 →LUMO (18%)                       |
|                 | S6    | 287.23                      | 0.5845 | HOMO-5 →LUMO (49%)<br>HOMO-4 →LUMO (20%)                       |
|                 | S7    | 266.15                      | 0.0281 | HOMO →LUMO+1 (46%)<br>HOMO-1 →LUMO+2 (11%)                     |
|                 | S8    | 256.48                      | 0.1553 | HOMO →LUMO+3 (39%)<br>HOMO-1 →LUMO+2 (11%)                     |
| C <sub>p1</sub> | S1    | 315.99                      | 0.2807 | HOMO →LUMO (49%)<br>HOMO-1 →LUMO+1 (20%)                       |
|                 | S2    | 311.75                      | 0.1822 | HOMO →LUMO+1 (46%)<br>HOMO-1 →LUMO (24%)                       |
|                 | S3    | 304.74                      | 0.0082 | HOMO-3 →LUMO (26%)<br>HOMO-4 →LUMO (18%)                       |
|                 | S4    | 304.60                      | 0.0041 | HOMO-3 →LUMO+1 (30%)<br>HOMO-4 →LUMO+1 (20%)                   |
|                 | S5    | 293.88                      | 0.5316 | HOMO-1 →LUMO (39%)<br>HOMO-8 →LUMO (13%)<br>HOMO-7 →LUMO (11%) |
|                 | S6    | 291.26                      | 0.2253 | HOMO-1 →LUMO (48%)<br>HOMO-7 →LUMO (12%)<br>HOMO-8 →LUMO (12%) |
|                 | S7    | 288.88                      | 0.2634 | HOMO-1 →LUMO (33%)<br>HOMO-8 →LUMO (19%)<br>HOMO-7 →LUMO (17%) |
|                 | S8    | 284.19                      | 0.2066 | HOMO-1 →LUMO+1 (41%)<br>HOMO-8 →LUMO+1 (15%)                   |
